# Supplementary material for: Selective chemical reagents to investigate the role of caspase 6 in apoptosis in acute leukemia T cells
Source: PubMed Central journal article supplement — Chem Sci. 2023 Jan 3;14(9):2289–302. doi: 10.1039/d2sc05827h (PMC9977399; doi:10.1039/d2sc05827h), 2023-01-03
Supplement: SC-014-D2SC05827H-s001.pdf [file SC-014-D2SC05827H-s001.pdf]

## **Selective chemical reagents to investigate the role of caspase 6 in apoptosis in acute leukemia T cells**

Katarzyna M. Groborz<sup>1,2\*</sup>, Małgorzata Kalinka<sup>1</sup>, Justyna Grzymska<sup>1</sup>, Sonia Kołt<sup>1</sup>, Scott J. Snipas<sup>3</sup>,  
Marcin Poreba<sup>1,\*</sup>

<sup>1</sup>Department of Chemical Biology and Bioimaging, Wrocław University of Science and Technology, Wyb. Wyspiańskiego 27, 50-370 Wrocław, Poland, <sup>2</sup>Genetech Inc., 1 DNA Way, South San Francisco, CA 94080, USA, <sup>3</sup>NCI Designated Cancer Center, Sanford Burnham Prebys Medical Discovery Institute, 10901 North Torrey Pines Road, La Jolla, CA 92037, USA

\*Corresponding authors: [groborzk@gene.com](mailto:groborzk@gene.com), [marcin.poreba@pwr.edu.pl](mailto:marcin.poreba@pwr.edu.pl)

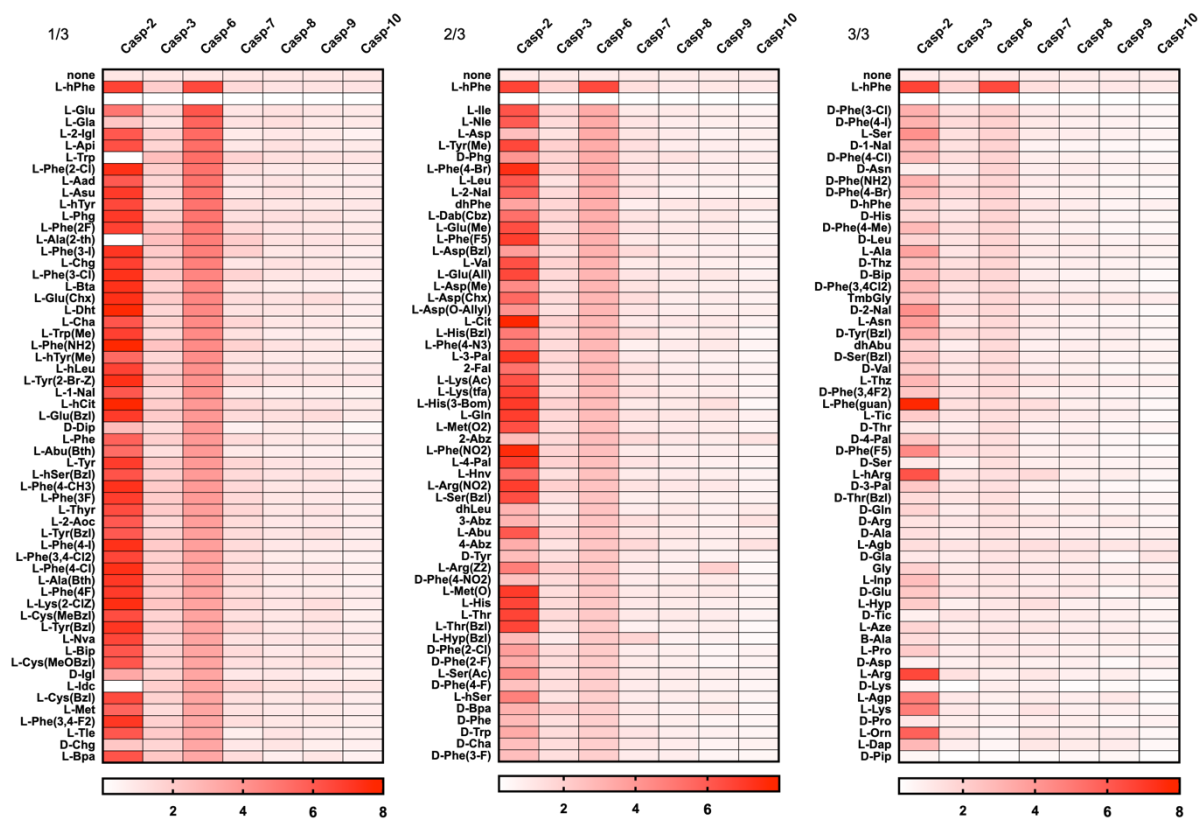

**Figure S1. Caspases specificity at the P5 position.** Human apoptotic caspases (-2, -3, -6, -7, -8, -9, -10) were screened at the P5 position with the combinatorial fluorogenic substrate library, Ac-P5-Mix-Glu-Mix-Asp-ACC. The relative rate of P5 substrate hydrolysis was divided by the hydrolysis rate of substrates mixture lacking P5 position (Ac-Mix-Glu-Mix-Asp-ACC, “none = 1”) and the specificity profile was expressed as white-red heat map, where the substrates were ordered by caspase-6 preferences, from highest to lowest.

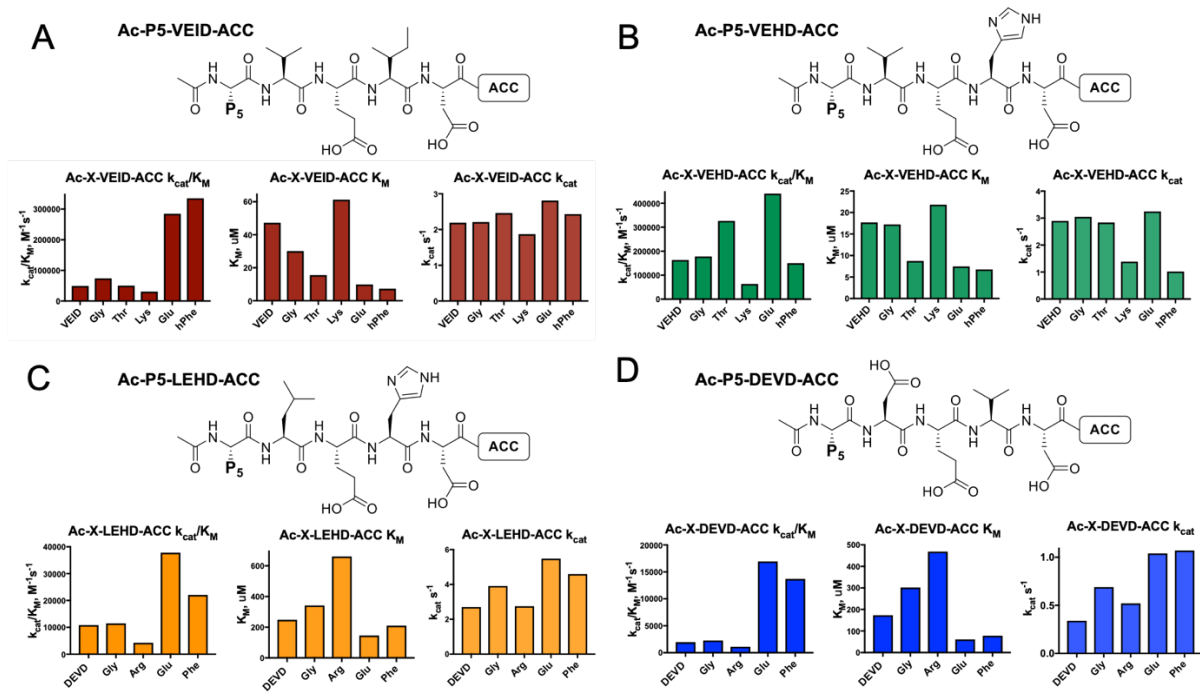

**Figure S2. Detailed analysis of caspase 6 subsite cooperativity.** To accurately examine the substrate-caspase 6 interactions and potential subsite cooperativity, we performed a comprehensive analysis of caspase 6 cleavage preferences towards four sets of substrates bearing various tetrapeptide motifs: VEID (**Panel A**), VEHD (**Panel B**), LEHD (**Panel C**), and DEVD (**Panel D**). Each panel represents different substrates with fixed P1-P4 amino acid residues and one of five P5 amino acid residues (G, T, K, E, hF in Panels A, B, and G, R, E, F in Panels C, D). The kinetic parameters ( $k_{cat}/K_M$ ,  $K_M$ , and  $k_{cat}$ ) are presented on the y-axis, whereas the P5 amino acids are presented on the x-axis. In each set of substrates, a tetrapeptide substrate lacking a P5 amino acid was used as a control.

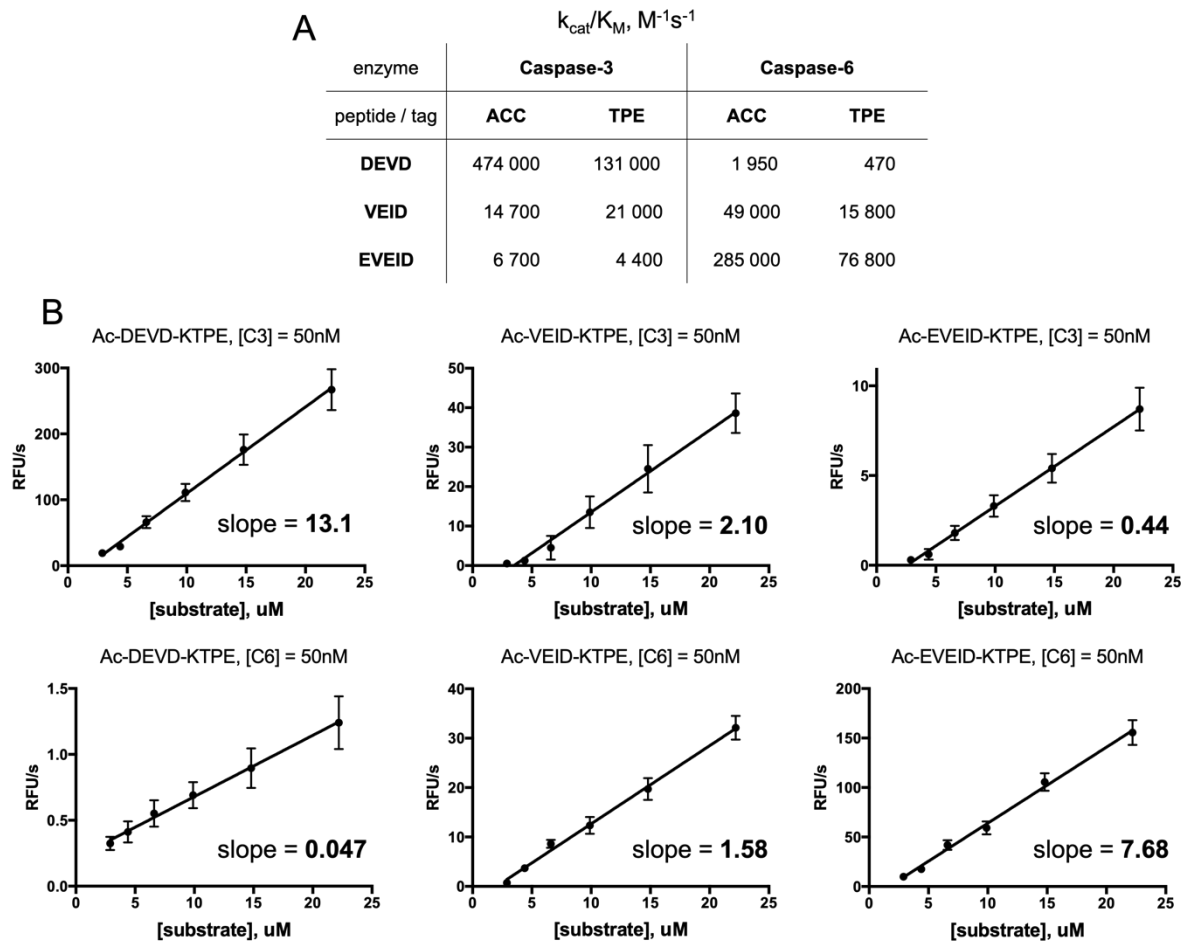

**Figure S3. The kinetic analysis of AIE substrates.** **A** The table with  $k_{cat}/K_M$  parameters of DEVD-X, VEID-X, and EVEID-X substrates toward recombinant caspase 3 and caspase 6 (X stands for ACC or TPE tag). Data indicate that TPE-labeled peptides are potent substrates for caspases. **B** The velocity of substrate hydrolysis by recombinant caspase 3 and caspase 6 (at 50nM). Slope value (RFU/s\* $\mu$ M) was used to calculate  $k_{cat}/K_M$  value ( $M^{-1}s^{-1}$ ).

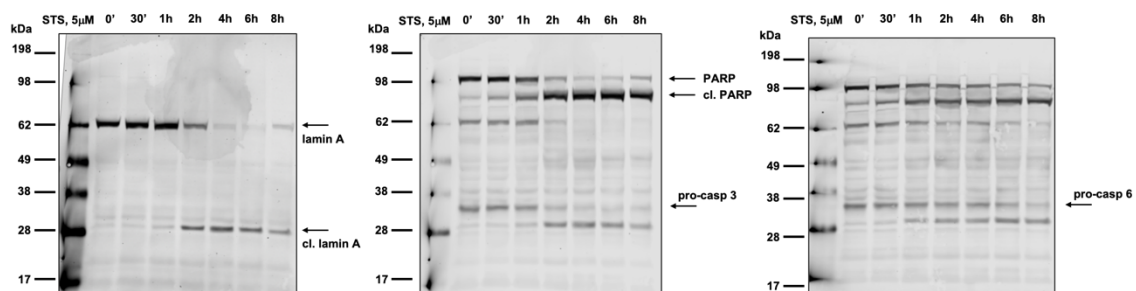

**Figure S4 Caspases activation in STS-treated Jurkat T cells.** The activation of pro-caspase 3 (p32) and pro-caspase 6 (p35) into mature forms, and the processing of PARP (p116  $\rightarrow$  p89) and lamin A (p74  $\rightarrow$  p28) substrates demonstrate hierarchical activation of executioner caspases.

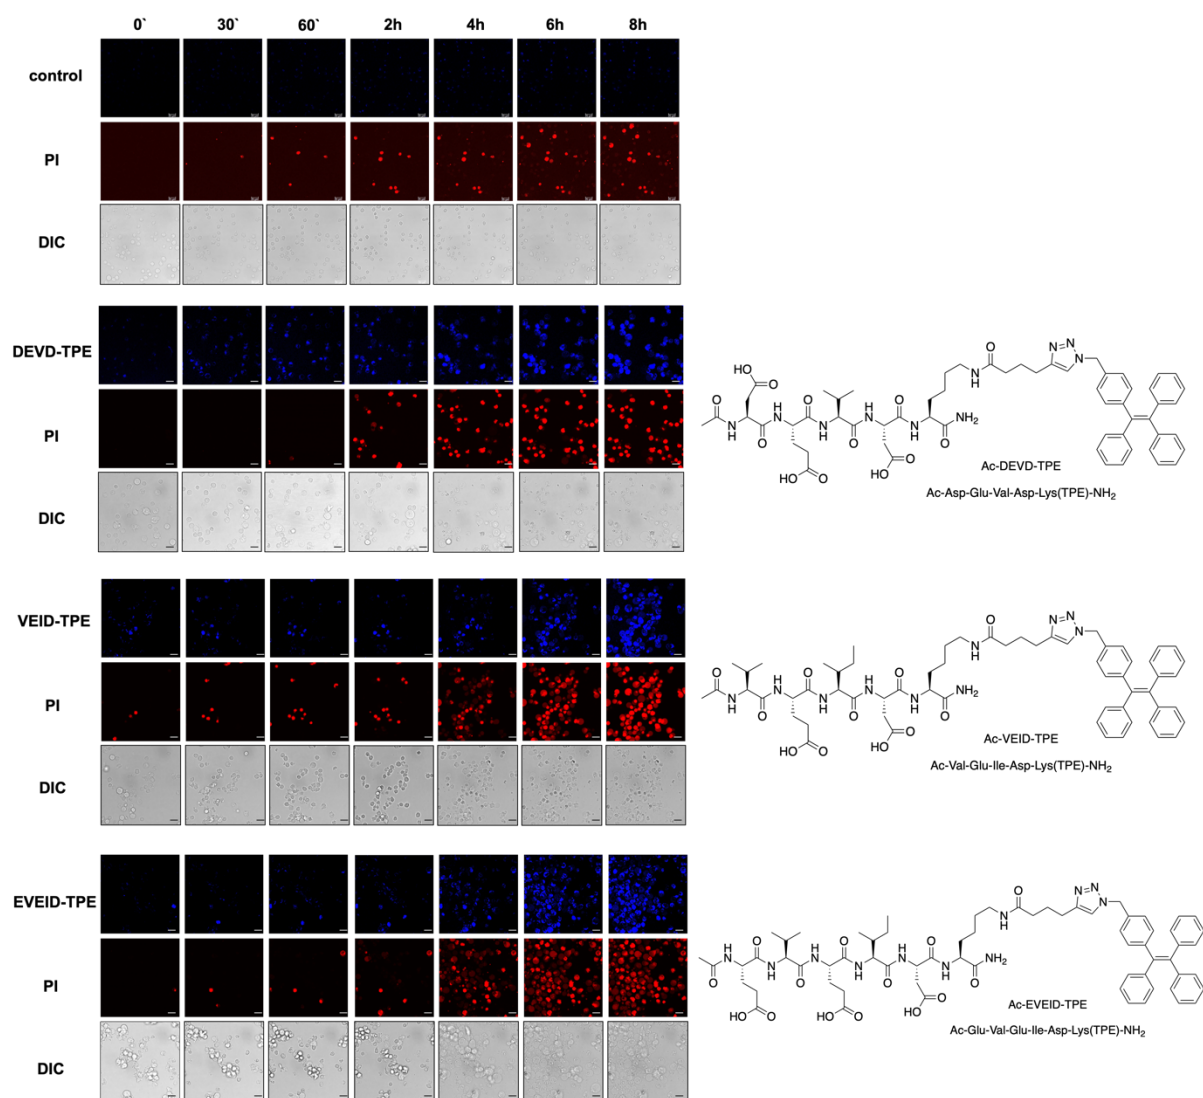

**Figure S5. Real-time imaging of caspase activation in Jurkat T cells using various fluorogens.** Ac-DEVD-TPE was designed to monitor the activation of caspases 3/7, whereas Ac-EVEID-TPE was designed to monitor the activation of caspase 6. The Ac-VEID-TPE substrates detects the activity of caspases 3, 6, and 7. TPE substrates were preincubated with Jurkat T cells for 2 hours prior to staurosporine stimulation.

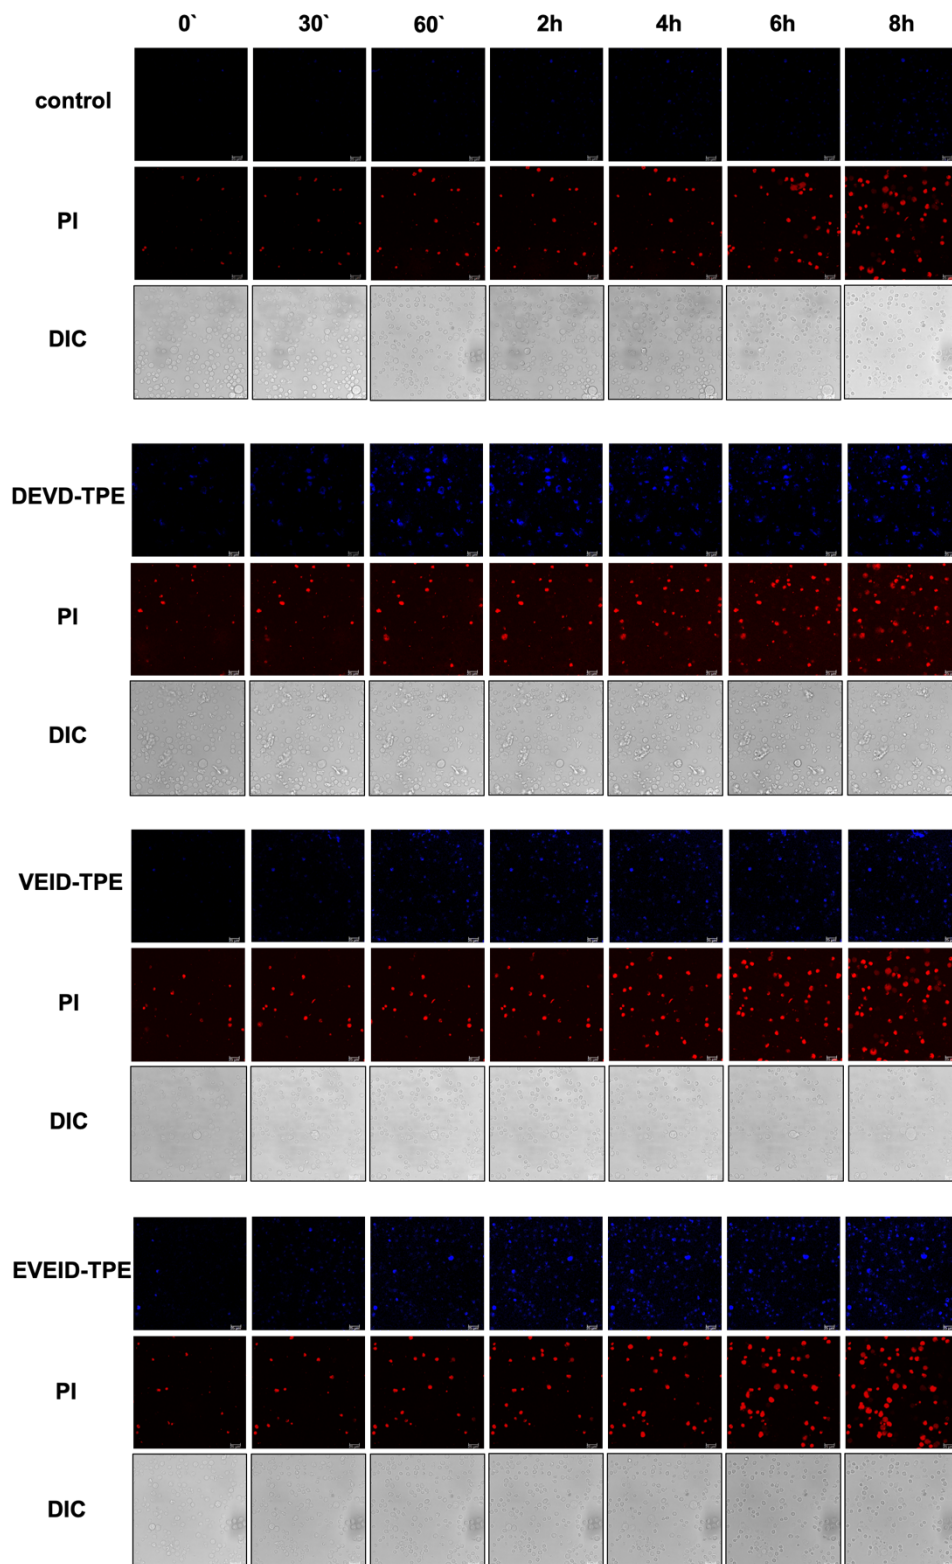

**Figure S6. Real-time imaging of caspase activation in Jurkat T cells using various fluorogens.** Ac-DEVD-TPE was designed to monitor the activation of caspases 3/7, whereas Ac-EVEID-TPE was designed to monitor the activation of caspase 6. The Ac-VEID-TPE substrates detects the activity of caspases 3, 6, and 7. TPE substrates were preincubated with Jurkat T cells for 10 hours prior to staurosporine stimulation.

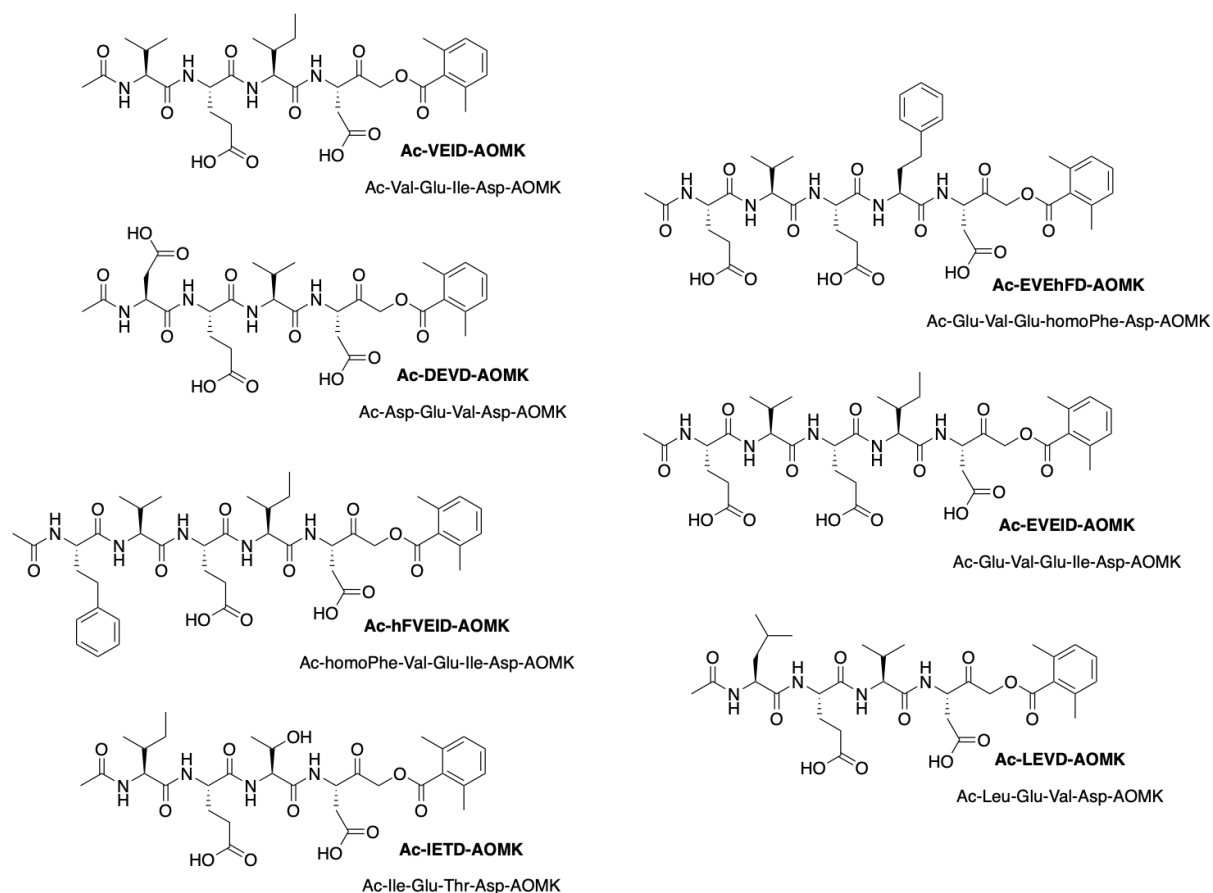

**Figure S7. Structure of caspase inhibitors bearing AOMK electrophilic warhead.** AOMK is acyloxymethyl ketone (2,6-dimethylbenzyloxymethyl ketone). hF (homoPhe) is homo-phenylalanine.

| inhibitor | $K_{obs}/I, M^{-1}s^{-1}$ |           |           |         |        |         |
|-----------|---------------------------|-----------|-----------|---------|--------|---------|
|           | Casp-3                    | Casp-6    | Casp-7    | Casp-8  | Casp-9 | Casp-10 |
| VEID      | 573 000                   | 1 440 000 | 63 000    | 524 000 | 37 800 | 113 000 |
| DEVD      | 6 900 000                 | 345 000   | 1 230 000 | 576 000 | 5 700  | 68 500  |
| hFVEID    | 1 020 000                 | 1 990 000 | 49 600    | 51 100  | 24 000 | 78 400  |
| IETD      | 252 000                   | 542 000   | 32 000    | 573 000 | 15 200 | 136 000 |
| LEVD      | 430 000                   | 285 000   | 112 000   | 635 000 | 15 000 | 78 000  |
| EVEhFD    | 1 120 000                 | 1 650 000 | 72 500    | 461 000 | 26 200 | 86 500  |
| EVEID     | 48 000                    | 472 000   | 10 100    | 71 000  | 7 300  | 12 200  |

**Figure S8. Kinetic parameters of tetra- and pentapeptide inhibitors toward recombinant human caspases.** The general structure of inhibitors is Ac-(P5)-P4-P3-P2-Asp-AOMK.

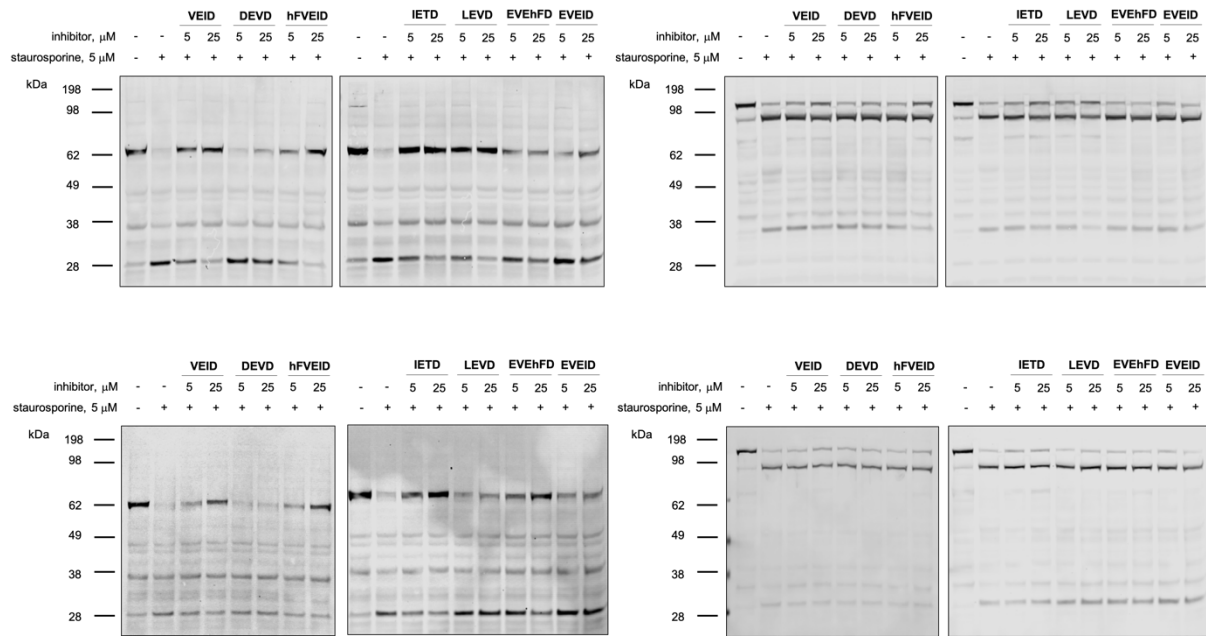

**Figure S9. Analysis of caspase 6 activity by covalent inhibitors.** The influence of small molecule inhibitors on PARP and lamin A processing by caspases 3 and 6 in staurosporine-treated Jurkat T cells. The most potent caspase 6 inhibitors almost completely blocked lamin A cleavage, whereas most of caspase 3 inhibitors failed to prevent from PARP processing.



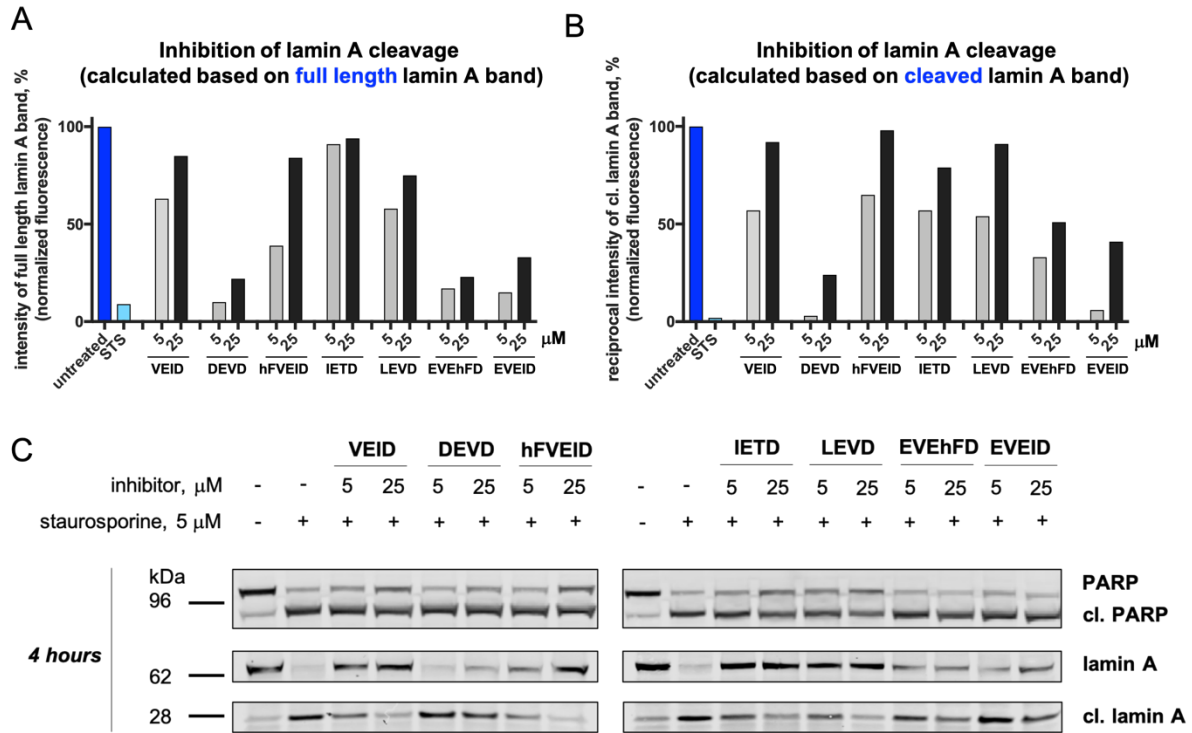

**Figure S10. Analysis of caspase 6 activation and lamin A cleavage with a set of covalent inhibitors – quantitative Western blot analysis.** **A** The fluorescence of WB bands indicating full-length lamin A was counted, normalized (untreated vs. STS-treated), and utilized to calculate the % of inhibition of lamin A cleavage. **B** The fluorescence of WB bands indicating cleaved lamin A was counted, normalized (untreated vs. STS-treated), and utilized to calculate the % of inhibition of lamin A cleavage. **C** indicates the bands of full-length and cleaved lamin A that were taken for the analysis.

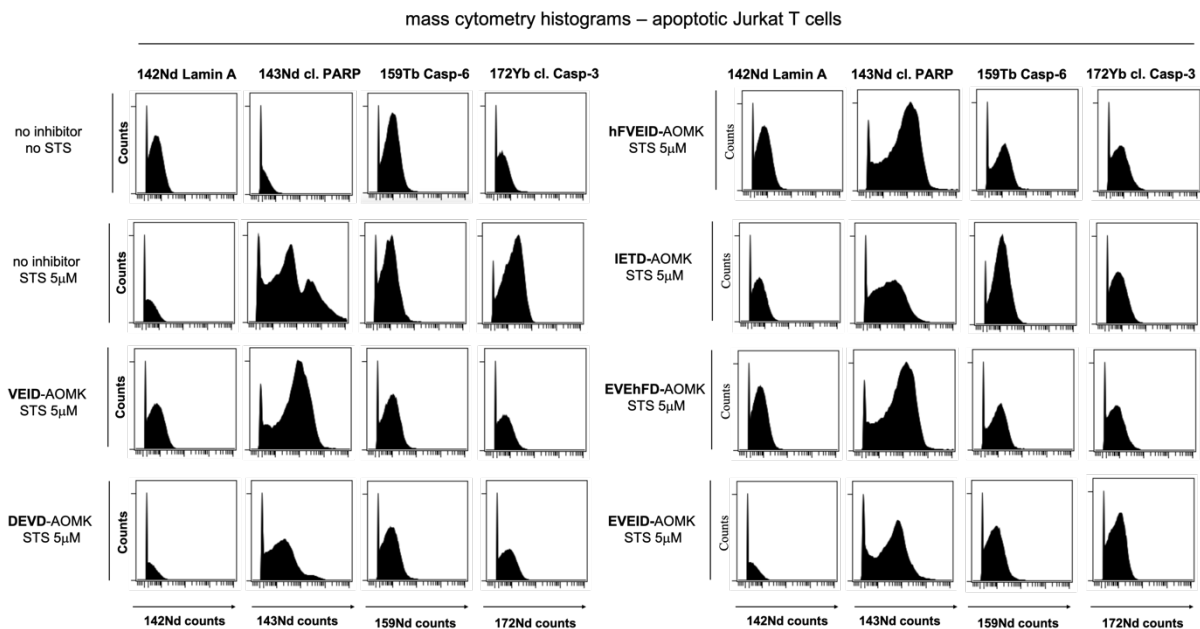

**Figure S11. Analysis of apoptotic Jurkat T cells by mass cytometry.** Histograms demonstrate the labeling of four apoptotic proteins: lamin A, cleaved PARP, caspase 6 and cleaved caspase 3 in staurosporine-treated

Jurkat T cells in the presence of various inhibitors. Data demonstrate that VEID, hFVEID and IETD inhibitors bind caspase 6 thus block lamin A processing, whereas DEVD and VEID inhibitors block procaspase 3 activation and PARP processing.

| Compound                                                 | [m/z + H] <sup>+</sup> calculated        | [m/z + H] <sup>+</sup> measured |
|----------------------------------------------------------|------------------------------------------|---------------------------------|
| <b>ACC substrates Ac-peptide-ACC</b>                     |                                          |                                 |
| Ac-VEID-ACC                                              | 717.31                                   | 717.36                          |
| Ac-GVEID-ACC                                             | 774.33                                   | 774.39                          |
| Ac-TVEID-ACC                                             | 818.36                                   | 818.43                          |
| Ac-KVEID-ACC                                             | 845.40                                   | 845.48                          |
| Ac-EVEID-ACC                                             | 846.35                                   | 846.38                          |
| Ac-hFVEID-ACC                                            | 878.39                                   | 878.45                          |
| Ac-VEHD-ACC                                              | 741.28                                   | 741.34                          |
| Ac-GVEHD-ACC                                             | 798.30                                   | 798.35                          |
| Ac-TVEHD-ACC                                             | 842.33                                   | 842.39                          |
| Ac-KVEHD-ACC                                             | 869.37                                   | 869.48                          |
| Ac-EVEHD-ACC                                             | 870.32                                   | 870.38                          |
| Ac-hFVEHD-ACC                                            | 902.36                                   | 902.39                          |
| Ac-LEHD-ACC                                              | 755.30                                   | 755.34                          |
| Ac-GLEHD-ACC                                             | 812.32                                   | 812.33                          |
| Ac-RLEHD-ACC                                             | 911.40                                   | 911.45                          |
| Ac-ELEHD-ACC                                             | 884.34                                   | 884.35                          |
| Ac-FLEHD-ACC                                             | 902.37                                   | 902.42                          |
| Ac-DEVD-ACC                                              | 719.25                                   | 719.31                          |
| Ac-GDEVD-ACC                                             | 776.27                                   | 776.33                          |
| Ac-RDEVD-ACC                                             | 875.35                                   | 875.39                          |
| Ac-EDEVD-ACC                                             | 848.30                                   | 848.34                          |
| Ac-FDEVD-ACC                                             | 866.32                                   | 866.37                          |
| <b>TPE substrates Ac-peptide-Lys(TPE)-NH<sub>2</sub></b> |                                          |                                 |
| Ac-DEVD-K(TPE)-NH <sub>2</sub>                           | 1127.52                                  | 1127.59                         |
| Ac-VEID-K(TPE)-NH <sub>2</sub>                           | 1125.58                                  | 1125.66                         |
| Ac-EVEID-K(TPE)-NH <sub>2</sub>                          | 1254.62<br>627.81 [m/2 + H] <sup>+</sup> | 627.89 [m/2 + H] <sup>+</sup>   |
| Ac-hFVEID-K(TPE)-NH <sub>2</sub>                         | 1286.66<br>643.83 [m/2 + H] <sup>+</sup> | 643.88 [m/2 + H] <sup>+</sup>   |
| <b>AOMK inhibitors, Ac-peptide-AOMK</b>                  |                                          |                                 |
| Ac-VEID-AOMK                                             | 663.32                                   | 663.37                          |
| Ac-DEVD-AOMK                                             | 665.27                                   | 665.32                          |
| Ac-hFVEID-AOMK                                           | 824.41                                   | 824.45                          |
| Ac-IETD-AOMK                                             | 665.30                                   | 665.33                          |
| Ac-LEVD-AOMK                                             | 663.32                                   | 663.36                          |
| Ac-EVEhFD-AOMK                                           | 840.37                                   | 840.41                          |
| Ac-EVEID-AOMK                                            | 729.37                                   | 729.40                          |

**Table S1. Molecular mass of caspase substrates and inhibitors.** All compounds were purified on RP-HPLC and displayed at least 95% of purity (measured with LC-MS, 220 nm).
